# Supplementary material for: Behavioral responses of free-flying Drosophila melanogaster to shiny, reflecting surfaces
Source: PubMed Central journal article supplement (PMC10643280; doi:10.1007/s00359-023-01676-0), 2023-10-05
Supplement: 359_2023_1676_MOESM3_ESM.pdf [file 359_2023_1676_MOESM3_ESM.pdf]

| Flight            |                      |                   |                      |                   |                    | Landings          |                    |  |  |
|-------------------|----------------------|-------------------|----------------------|-------------------|--------------------|-------------------|--------------------|--|--|
| Hydrated          |                      | Dehydrated        |                      | Hydrated          |                    | Dehydrated        |                    |  |  |
| Number of flies   | Number of detections | Number of flies   | Number of detections | Number of flies   | Number of landings | Number of flies   | Number of landings |  |  |
| Matt plate        |                      | Matt plate        |                      | Matt plate        |                    | Matt plate        |                    |  |  |
| 211               | 280730               | 122               | 722480               | 211               | 95                 | 122               | 1000               |  |  |
| 150               | 257180               | 119               | 708580               | 150               | 57                 | 108               | 1000               |  |  |
| 131               | 229850               | 108               | 929900               | 131               | 71                 | 47                | 1000               |  |  |
| 98                | 204440               | 111               | 923090               | 98                | 101                | 99                | 1000               |  |  |
| 149               | 342320               | 106               | 474520               | 149               | 231                | 86                | 1000               |  |  |
| 116               | 146270               | 121               | 620160               | 116               | 73                 | 110               | 1000               |  |  |
| 122               | 323610               | 47                | 238540               | 122               | 243                |                   |                    |  |  |
| 207               | 467940               | 99                | 674580               | 207               | 160                |                   |                    |  |  |
| 129               | 408880               | 86                | 772840               |                   |                    |                   |                    |  |  |
| 107               | 603140               | 110               | 671660               |                   |                    |                   |                    |  |  |
| Shiny film center |                      | Shiny film center |                      | Shiny film center |                    | Shiny film center |                    |  |  |
| 111               | 211390               | 127               | 579930               | 111               | 39                 | 127               | 1000               |  |  |
| 101               | 310170               | 122               | 563460               | 101               | 189                | 122               | 1001               |  |  |
| 78                | 181790               | 161               | 717170               | 78                | 230                | 161               | 1000               |  |  |
| 85                | 335120               | 179               | 902230               | 85                | 345                | 95                | 1000               |  |  |
| 175               | 501990               | 120               | 508490               | 175               | 175                | 115               | 1000               |  |  |
| 130               | 311580               | 95                | 456500               | 130               | 127                | 77                | 1000               |  |  |
| 105               | 246690               | 115               | 536580               | 116               | 85                 | 110               | 1000               |  |  |
| 116               | 386540               | 77                | 425320               | 111               | 74                 | 113               | 1001               |  |  |
| 111               | 335880               | 110               | 553080               | 114               | 250                |                   |                    |  |  |
| 114               | 510610               | 113               | 485630               |                   |                    |                   |                    |  |  |
| Water center      |                      | Water center      |                      | Water center      |                    | Water center      |                    |  |  |
| 150               | 164810               | 60                | 80077                | 150               | 105                | 60                | 96                 |  |  |
| 90                | 109890               | 120               | 186660               | 90                | 70                 | 120               | 161                |  |  |
| 170               | 120410               | 90                | 175020               | 170               | 94                 | 90                | 240                |  |  |
| 90                | 122970               | 20                | 18588                | 90                | 62                 | 20                | 25                 |  |  |
| 80                | 204750               | 60                | 48488                | 80                | 56                 | 60                | 106                |  |  |
| 170               | 248450               | 20                | 60042                | 170               | 122                | 20                | 20                 |  |  |
| 110               | 71571                | 110               | 221280               | 110               | 82                 | 110               | 224                |  |  |
| 120               | 186860               | 110               | 222620               | 120               | 119                | 110               | 389                |  |  |
